# Supplementary material for: Effectiveness of nasal irrigation devices: a Thai multicentre survey
Source: PeerJ journal article supplement (doi:10.7717/peerj.7000), 2019-05-27
Supplement: Codebook.pdf [file Codebook.pdf]

## Codebook

| Variables      | Description                           | Value label                                                                                                              |
|----------------|---------------------------------------|--------------------------------------------------------------------------------------------------------------------------|
| ID             | ID                                    |                                                                                                                          |
| Site           | Major site and subsite of recruitment |                                                                                                                          |
| a1gender       | Gender                                | 1 = male, 2 = female                                                                                                     |
| a2age          | Age                                   |                                                                                                                          |
| a3smoke        | Smoking                               | 0 = no, 1 = yes                                                                                                          |
| a4device       | Devices used                          | 1 = syringe 2 = syringe with adapter 3 = squeeze bottle 4 = Neti pot 5 = bulb 6 = Spray 7 = Drops                        |
| b1disease1     | Nasal diseases                        | 1. Allergic rhinitis 2. Acute rhinosinusitis 3. Chronic rhinosinusitis 4. Post-operative 5. Common cold. 6. Others....   |
| b1disease2     | Nasal diseases                        | 1. Allergic rhinitis 2. Acute rhinosinusitis 3. Chronic rhinosinusitis 4. Post-operative 5. Common cold. 6. Others....   |
| b1disease3     | Nasal diseases                        | 1. Allergic rhinitis 2. Acute rhinosinusitis 3. Chronic rhinosinusitis 4. Post-operative 5. Common cold. 6. Others....   |
| b2timeMonth    | Have been using this device for       |                                                                                                                          |
| b3frequencyDay | Frequency of use                      |                                                                                                                          |
| b4irrigate     | You use the device                    | 1. regularly, 2. When have nasal symptoms, 3. Other                                                                      |
| b5teach1       | Who teaches you to use the device     | 1. Physician 2. Nurse 3. Pharmacist 4. Parent 5. Self-learning                                                           |
| b5teach2       | Who teaches you to use the device     | 1. Physician 2. Nurse 3. Pharmacist 4. Parent 5. Self-learning                                                           |
| b5teach3       | Who teaches you to use the device     | 1. Physician 2. Nurse 3. Pharmacist 4. Parent 5. Self-learning                                                           |
| b60            | The problem of this device            | 0. No 1. Nasal pain 2. Solution retention 3. Epistaxis 4. Headache 5. Aspiration 6. Hearing loss 7. Salty taste 8. Other |
| b61            | The problem of this device            | 0. No 1. Nasal pain 2. Solution retention 3. Epistaxis 4. Headache 5. Aspiration 6. Hearing loss 7. Salty taste 8. Other |

|               |                                           |                                                                                                                          |
|---------------|-------------------------------------------|--------------------------------------------------------------------------------------------------------------------------|
| b62           | The problem of this device                | 0. No 1. Nasal pain 2. Solution retention 3. Epistaxis 4. Headache 5. Aspiration 6. Hearing loss 7. Salty taste 8. Other |
| b63           | The problem of this device                | 0. No 1. Nasal pain 2. Solution retention 3. Epistaxis 4. Headache 5. Aspiration 6. Hearing loss 7. Salty taste 8. Other |
| b64           | The problem of this device                | 0. No 1. Nasal pain 2. Solution retention 3. Epistaxis 4. Headache 5. Aspiration 6. Hearing loss 7. Salty taste 8. Other |
| b65           | The problem of this device                | 0. No 1. Nasal pain 2. Solution retention 3. Epistaxis 4. Headache 5. Aspiration 6. Hearing loss 7. Salty taste 8. Other |
| b66           | The problem of this device                | 0. No 1. Nasal pain 2. Solution retention 3. Epistaxis 4. Headache 5. Aspiration 6. Hearing loss 7. Salty taste 8. Other |
| b67           | The problem of this device                | 0. No 1. Nasal pain 2. Solution retention 3. Epistaxis 4. Headache 5. Aspiration 6. Hearing loss 7. Salty taste 8. Other |
| b68           | The problem of this device                | 0. No 1. Nasal pain 2. Solution retention 3. Epistaxis 4. Headache 5. Aspiration 6. Hearing loss 7. Salty taste 8. Other |
| b69           | The problem of this device                | 0. No 1. Nasal pain 2. Solution retention 3. Epistaxis 4. Headache 5. Aspiration 6. Hearing loss 7. Salty taste 8. Other |
| b7posture     | Position                                  | 1. Flex neck 2. Extend neck 3. Other                                                                                     |
| b8breath1     | Do you breathe when performing irrigation | 1. Nasal breath 2. Hold the breath 3. Oral breathe 4. Other                                                              |
| b8breath2     | Do you breathe when performing irrigation | 1. Nasal breath 2. Hold the breath 3. Oral breathe 4. Other                                                              |
| b9brand       | Name of the device                        |                                                                                                                          |
| b10brokeMonth | The device broke in                       |                                                                                                                          |
| b11clean1     | You clean the device using                | 1. Soap 2. Saline 3. Warm water 4. Boil 5. Other                                                                         |
| b11clean2     | You clean the device using                | 1. Soap 2. Saline 3. Warm water 4. Boil 5. Other                                                                         |
| b12get1       | You got this device from                  | 1. Hospital 2. Pharmacist 3. Clinic                                                                                      |
| b12get2       | You got this device from                  | 1. Hospital 2. Pharmacist 3. Clinic                                                                                      |

|            |                                      |                                     |
|------------|--------------------------------------|-------------------------------------|
| b12get3    | You got this device from             | 1. Hospital 2. Pharmacist 3. Clinic |
| c1         | Improve overall symptom              |                                     |
| c2symptom  | No nasal congestion before           | 0. No 1. Yes                        |
| c2         | Improve nasal congestion             |                                     |
| c3symptom  | No runny nose before                 | 0. No 1. Yes                        |
| c3         | Decrease runny nose                  |                                     |
| c4symptom  | No need to blowing nose before       | 0. No 1. Yes                        |
| c4         | Decrease blowing nose                |                                     |
| c5symptom  | No nasal section before              | 0. No 1. Yes                        |
| c5         | Decrease viscosity                   |                                     |
| c6symptom  | No pain before                       | 0. No 1. Yes                        |
| c6         | Improve sinus pain/headache          |                                     |
| c7symptom  | No post-nasal drip before            | 0. No 1. Yes                        |
| c7         | Decrease post-nasal drip             |                                     |
| c8symptom  | No taste/smell disturbed before      | 0. No 1. Yes                        |
| c8         | Improve taste and smell              |                                     |
| c9symptom  | No sneezing before                   | 0. No 1. Yes                        |
| c9         | Decrease sneezing                    |                                     |
| c10symptom | No cough before                      | 0. No 1. Yes                        |
| c10        | Decrease cough                       |                                     |
| c11symptom | No nasal section before              | 0. No 1. Yes                        |
| c11        | Clear the secretion                  |                                     |
| c12symptom | No sleep abnormality before          | 0. No 1. Yes                        |
| c12        | Improve sleep quality                |                                     |
| c13        | Easy to use                          |                                     |
| c14        | Simple                               |                                     |
| c15        | Fast learning                        |                                     |
| c16        | Can remember the instruction         |                                     |
| c17        | Satisfaction of this device          |                                     |
| c18        | Would recommend the device to others |                                     |
